# Supplementary material for: MPLA and AddaVax® Adjuvants Fail to Promote Intramuscular LaAg Vaccine Protectiveness against Experimental Cutaneous Leishmaniasis
Source: MDPI journal article supplement (doi:10.3390/microorganisms9061272), 2021-06-11
Supplement: s1 [file s1]

## Supplementary information

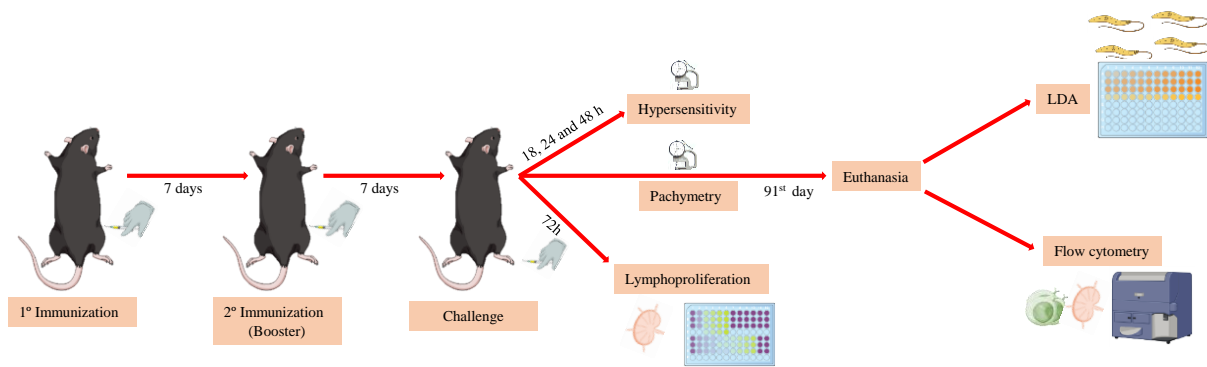

**Figure S1.** Immunization and challenge protocol. Mice were immunized twice via the intramuscular route in the posterior muscular region of the right hind footpad at intervals of 7 days between each dose (100  $\mu$ L of the vaccine formulation as described in the Material and Methods) and 7 days after the second immunization the mice were challenged with  $2 \times 10^5$  or  $2 \times 10^6$  *L. amazonensis* stationary-phase promastigotes in the right hind footpad and the hypersensitivity and lymphoproliferation assay was performed. The lesion development was monitored by pachymetry during the experiment. At the end of the experiments, the parasite load (LDA) and flow cytometry were evaluated.
